# Supplementary material
Source: publisher site journal article supplement (https://www.spandidos-publications.com/3899/downloadSupplementary)

Figure S1. Transfection efficiency of miR-136-5p mimics and inhibitor, and the expression of B3GNT5 in tissues and cell lines. Proof of transfection for (A) miR-136-5p mimics or (B) inhibitor. (C) Western blotting was performed to detect the expression of B3GNT5 in N and T tissues. (D) Western blotting was conducted to detect the expression of B3GNT5 in normal cells and cancer cell lines. \* $P < 0.05$ , \*\* $P < 0.01$ , \*\*\* $P < 0.001$  vs. miRNA NC. miR/miRNA, microRNA; N, normal; T, tumor; NC, negative control.

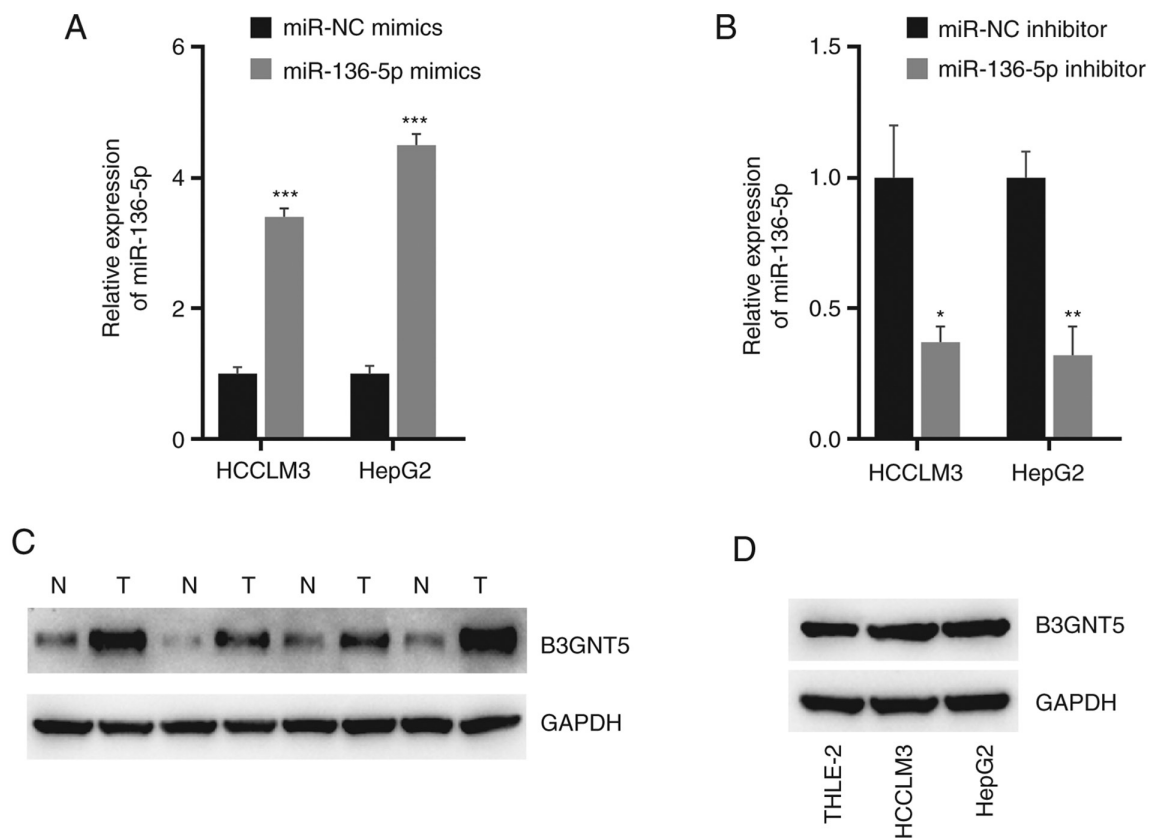

Supplement: Supplementary file 1 [file downloadSupplementary]
